# Supplementary material
Source: HighWire-hosted journal article supplement (https://www.jrheum.org/highwire/filestream/34555/field_highwire_adjunct_files/0/180427DataSuppl.pdf)
Supplement: 180427DataSuppl.pdf [file 180427DataSuppl.pdf]

**Supplementary Table 1:** Outcome definition – a cardiovascular event defined as:

|                                                                                                                                                                                                |                                                                                                   |
|------------------------------------------------------------------------------------------------------------------------------------------------------------------------------------------------|---------------------------------------------------------------------------------------------------|
| Acute myocardial infarction                                                                                                                                                                    | <b>ICD9:</b> 410<br><b>ICD10:</b> I21, I22                                                        |
| Stroke                                                                                                                                                                                         | <b>ICD9:</b> 430, 431, 434, 436, 3623<br><b>ICD10:</b> I60, I61, I63 (excluding I63.6), I64, H341 |
| Congestive heart failure                                                                                                                                                                       | <b>ICD9:</b> 428<br><b>ICD10:</b> I50                                                             |
| Percutaneous coronary intervention                                                                                                                                                             | <b>CCP codes:</b> 4802, 4803, 4809<br><b>CCI codes:</b> 1IJ50, 1IJ57GQ                            |
| Coronary artery bypass graft surgery                                                                                                                                                           | <b>CCP code:</b> 481<br><b>CCI code:</b> 1IJ76                                                    |
| CCI indicates Canadian Classification of Health Interventions; CCP, Canadian Classification of Diagnostic, Therapeutic, and Surgical Procedures; ICD, International Classification of Disease. |                                                                                                   |

**Supplementary Table 2:** Baseline comorbidity definitions.

|                                                                                                                              |                                                                                                                                                                                                                                                                                                                                                           |
|------------------------------------------------------------------------------------------------------------------------------|-----------------------------------------------------------------------------------------------------------------------------------------------------------------------------------------------------------------------------------------------------------------------------------------------------------------------------------------------------------|
| Diabetes                                                                                                                     | One or more hospitalizations or two or more OHIP claims or one or more OHIP fee codes<br><b>OHIP:</b> 250 <b>Fee code:</b> Q040, K029, K030 <b>ICD9:</b> 250 <b>ICD10:</b> E10-E14                                                                                                                                                                        |
| COPD/Asthma                                                                                                                  | One or more hospitalizations or two or more OHIP claims for asthma within 2 years; or one or more OHIP claims for COPD<br><b>OHIP:</b> 491, 492, 493, 496 <b>ICD9:</b> 491, 492, 493, 496 <b>ICD10:</b> J41, J42, J43, J44, J45, J46,                                                                                                                     |
| Coronary artery disease                                                                                                      | One or more hospitalizations or two or more OHIP claims<br><b>OHIP:</b> 412 <b>ICD9:</b> 410, 411, 412, 413, 414 <b>ICD10:</b> I20, I21, I22, I23, I24, I250, I251, I252, I254, I255, I256, I258, I259                                                                                                                                                    |
| Cancer                                                                                                                       | One or more hospitalizations or two or more OHIP claims<br><b>OHIP:</b> 140 to 209 <b>ICD9:</b> 140 to 209 <b>ICD10:</b> C00 to C100                                                                                                                                                                                                                      |
| Extra-articular RA Features                                                                                                  | One or more hospitalizations or two or more OHIP claims<br><b>OHIP:</b> 511, 515, 466, 686 <b>ICD 9:</b> 515, 379, 446, 7148, 5110, 5118, 5119, 5064, 5081, 5163, 7707, 7141, 7142, 7102, 6860, 3571, 3540, 3555, 2773 <b>ICD10:</b> J90, J91, J84, I39, H15, L95, L88, E85, J990, M050, I528, I418, I328, H193, M350, M051, M052, M053, G635, G560, G575 |
| Osteoporosis                                                                                                                 | One or more hospitalizations or two or more OHIP claims<br><b>OHIP:</b> 733 <b>ICD9:</b> 7330 <b>ICD10:</b> M80, M81                                                                                                                                                                                                                                      |
| Acute myocardial infarction                                                                                                  | One or more hospitalizations<br><b>ICD-9:</b> 410, 412 <b>ICD10:</b> I21, I22, I252                                                                                                                                                                                                                                                                       |
| Chronic renal failure                                                                                                        | One or more hospitalizations or OHIP claims<br><b>OHIP:</b> 403, 404, 585 <b>ICD9:</b> 403, 404, 585, V56 <b>ICD10:</b> N18, Z49, Z992, T824, I120, V451, N032, N033, N034, N035, N036, N037, N052, N053, N054, N055, N056, N057, I131, I132,                                                                                                             |
| Acute renal failure                                                                                                          | One or more hospitalizations or OHIP claims<br><b>OHIP:</b> 584, 586 <b>ICD9:</b> 584, 586 <b>ICD10:</b> N17, N19                                                                                                                                                                                                                                         |
| Cerebrovascular disease                                                                                                      | One or more hospitalizations<br><b>ICD9:</b> 434, 436 <b>ICD10:</b> I63, I64                                                                                                                                                                                                                                                                              |
| Hypertension                                                                                                                 | Two or more OHIP claims within 2 years or one or more hospitalizations<br><b>OHIP:</b> 401, 402, 403, 404, 405 <b>ICD-9:</b> 401, 402, 403, 404, 405<br><b>ICD-10:</b> I10, I11, I12, I13, I15                                                                                                                                                            |
| Osteoarthritis                                                                                                               | One or more hospitalizations or two or more OHIP claims<br><b>OHIP:</b> 715 <b>ICD9:</b> 715 <b>ICD10:</b> M15-M19                                                                                                                                                                                                                                        |
| OHIP: Ontario Health Insurance Plan – uses a coding system similar to ICD9.<br>ICD: International Classification of Diseases |                                                                                                                                                                                                                                                                                                                                                           |

**Supplementary Table 3:** Multivariable analysis among 19,942 RA patients free of prior cardiovascular disease at cohort entry (Model B).

| Variable                                            | HR <sup>1</sup> | 95% CI     | p-value |
|-----------------------------------------------------|-----------------|------------|---------|
| <b>MAIN EXPOSURES</b> <sup>2,3</sup>                |                 |            |         |
| Continuous use of MTX in first year only            | 0.86            | 0.74, 0.99 | 0.0388  |
| Continuous use of other csDMARDs in first year only | 0.91            | 0.80, 1.05 | 0.2040  |
| <b>CUMULATIVE USE OVER FOLLOW-UP</b> <sup>2,3</sup> |                 |            |         |
| Glucocorticosteroids                                | 1.08            | 1.05, 1.11 | <.0001  |
| NSAIDs                                              | 1.04            | 0.99, 1.09 | 0.1280  |
| COXIBs                                              | 1.04            | 1.00, 1.07 | 0.0265  |
| Anti-TNF                                            | 1.03            | 0.93, 1.14 | 0.5887  |
| Other bDMARDs                                       | 0.51            | 0.13,1.99  | 0.3353  |
| Statins                                             | 0.98            | 0.95, 1.00 | 0.0971  |
| Antihypertensives                                   | 1.01            | 0.98, 1.03 | 0.5971  |

<sup>1</sup>Adjusted for all other covariates as Table 3 and Table 4; <sup>2</sup>REF: non-use over the same period as the numerator; <sup>3</sup>Hazard ratio expressed as per year of additional use.
